# Supplementary material for: Thermography analysis as a tool for assessing thermal asymmetries and temperature changes after therapy in patients with stroke: a pilot study
Source: PeerJ. 2025 Aug 28;13:e19843. doi: 10.7717/peerj.19843 (PMC12399083; doi:10.7717/peerj.19843)
Supplement: Supplemental Information 1 [file peerj-13-19843-s001.xlsx]

## Sheet: Thermography Data
Sujeto	PRE_ARS	PRE_ALS	PRE_ARI	PRE_ALI	PRE_FRE	PRE_FRI	PRE_FLI	PRE_FLE	PRE_PLS	PRE_PRS	PRE_PLI	PRE_PRI	POST_ARS	POST_ALS	POST_ARI	POST_ALI	POST_FRE	POST_FRI	POST_FLI	POST_FLE	POST_PLS	POST_PRS	POST_PLI	POST_PRI
1	30.6876	30.5125	31.7076	29.5233	29.3884	31.319	29.9771	27.7483	29.6916	29.3884	27.851	28.0562	27.9194	27.5854	26.0382	25.1107	26.94	28.278	26.0208	27.1556	28.788	28.2098	25.3653	25.9772
2	30.6126	31.0951	31.0453	31.0287	29.8932	32.8083	32.8737	28.5248	32.1443	32.6611	32.4645	31.7984	31.9632	31.3604	31.7324	31.2278	25.4705	27.3191	27.8424	25.4004	30.7209	31.3769	30.2535	30.7792
3	31.8066	30.5542	32.284	30.3455	24.3518	26.2731	24.8995	22.7169	29.7504	31.8231	29.3041	32.21	30.019	29.4559	29.1182	28.6353	24.4492	26.2644	24.6878	22.798	30.4791	31.3355	28.0562	29.5738
4	30.4791	31.8973	29.7168	30.6459	26.9831	29.7672	30.7875	28.1415	32.2511	30.7626	30.8042	29.2365	30.1949	31.7654	29.076	29.9435	27.2331	27.8339	29.0929	26.6807	32.7511	31.0868	30.0442	29.0337
5	29.3041	30.2284	27.9536	29.3884	26.6201	28.9152	29.7336	26.0992	29.8092	29.3463	28.295	27.9707	31.1698	31.037	29.9855	30.5709	28.6947	29.6243	29.6075	28.3291	29.742	30.0442	28.2865	29.1098
6	30.6459	30.1363	30.9788	29.9352	27.6712	31.6168	30.3789	27.0694	31.5093	32.0456	29.0083	29.0929	31.1366	29.9519	31.3107	29.3884	30.5626	31.2029	29.6327	30.1698	31.1034	32.0126	29.6411	29.9184
7	27.7311	26.3426	26.073	28.8813	26.5768	27.2073	30.9123	28.2353	30.6876	29.2028	28.4993	26.4901	30.9705	32.325	29.3547	31.8891	26.1862	25.3741	31.8644	26.8018	32.5874	31.2941	30.4708	28.5418
8	33.7526	34.4154	32.1525	33.6066	29.1352	30.8791	32.325	30.0525	32.9145	31.4928	32.571	32.062	30.7043	32.0126	28.805	30.1112	28.0732	27.9878	29.4727	28.2609	29.5485	28.8897	29.2112	28.6353
9	29.1521	29.8008	26.0121	27.8168	27.8253	32.2922	32.1607	29.5317	32.1772	31.3024	29.9184	29.6579	31.468	32.3907	29.2028	30.1447	25.4267	27.9707	27.9194	25.5405	29.9603	29.742	27.7825	28.278
10	30.0693	31.3273	28.8135	30.0274	26.5681	28.7117	31.1781	27.6454	30.5375	29.7168	28.6268	27.3879	29.5401	30.9954	28.7371	29.1943	24.2543	26.0382	27.4824	25.8988	32.1689	30.7959	28.9067	27.9023

## Sheet: subtitle
POST_ARS	POSTERIOR	ANTERIOR	RIGHT	SUPERIOR
POST_ALS	POSTERIOR	ANTERIOR	LEFT	SUPERIOR
POST_ARI	POSTERIOR	ANTERIOR	RIGHT	INFERIOR
POST_ALI	POSTERIOR	ANTERIOR	LEFT	INFERIOR
POST_FRE	POSTERIOR	FOOT	RIGHT	EXTERNAL
POST_FRI	POSTERIOR	FOOT	RIGHT	INTERNAL
POST_FLI	POSTERIOR	FOOT	LEFT	INTERNAL
POST_FLE	POSTERIOR	FOOT	LEFT	EXTERNAL
POST_PLS	POSTERIOR	POSTERIOR	LEFT	SUPERIOR
POST_PRS	POSTERIOR	POSTERIOR	RIGHT	SUPERIOR
POST_PLI	POSTERIOR	POSTERIOR	LEFT	INFERIOR
POST_PRI	POSTERIOR	POSTERIOR	RIGHT	INFERIOR
PRE_ARS	PREVIA	ANTERIOR	RIGHT	SUPERIOR
PRE_ALS	PREVIA	ANTERIOR	LEFT	SUPERIOR
PRE_ARI	PREVIA	ANTERIOR	RIGHT	INFERIOR
PRE_ALI	PREVIA	ANTERIOR	LEFT	INFERIOR
PRE_FRE	PREVIA	FOOT	RIGHT	EXTERNAL
PRE_FRI	PREVIA	FOOT	RIGHT	INTERNAL
PRE_FLI	PREVIA	FOOT	LEFT	INTERNAL
PRE_FLE	PREVIA	FOOT	LEFT	EXTERNAL
PRE_PLS	PREVIA	POSTERIOR	LEFT	SUPERIOR
PRE_PRS	PREVIA	POSTERIOR	RIGHT	SUPERIOR
PRE_PLI	PREVIA	POSTERIOR	LEFT	INFERIOR
PRE_PRI	PREVIA	POSTERIOR	RIGHT	INFERIOR

## Sheet: source
	Label	Mean	StdDev	Mode	Min	Max	X	Y	XM	YM	Median	Skew	Kurt	Slice	Group
1	POST_ARS	27.9194	0	27.9194	27.9194	27.9194	82.8333	65.1667	82.8333	65.1667	27.9194	NaN	NaN	1	1
2	POST_ALS	27.5854	0	27.5854	27.5854	27.5854	97.6667	65.1667	97.6667	65.1667	27.5854	Infinity	NaN	1	1
3	POST_ARI	26.0382	0	26.0382	26.0382	26.0382	83.5	83	83.5	83	26.0382	Infinity	NaN	1	1
4	POST_ALI	25.1107	0	25.1107	25.1107	25.1107	96.3333	83.3333	96.3333	83.3333	25.1107	NaN	NaN	1	1
5	POST_FRE	26.94	0	26.94	26.94	26.94	64.8333	56.1667	64.8333	56.1667	26.94	Infinity	NaN	2	1
6	POST_FRI	28.278	0	28.278	28.278	28.278	71.6667	56.1667	71.6667	56.1667	28.278	#NAME?	NaN	2	1
7	POST_FLI	26.0208	0	26.0208	26.0208	26.0208	79.3333	58.3333	79.3333	58.3333	26.0208	NaN	#NAME?	2	1
8	POST_FLE	27.1556	0	27.1556	27.1556	27.1556	86	59.5	86	59.5	27.1556	NaN	#NAME?	2	1
9	POST_PLS	28.788	0	28.788	28.788	28.788	81.8333	65.8333	81.8333	65.8333	28.788	#NAME?	NaN	3	1
10	POST_PRS	28.2098	0	28.2098	28.2098	28.2098	97.3333	66	97.3333	66	28.2098	NaN	NaN	3	1
11	POST_PLI	25.3653	0	25.3653	25.3653	25.3653	83.6667	83.8333	83.6667	83.8333	25.3653	#NAME?	Infinity	3	1
12	POST_PRI	25.9772	0	25.9772	25.9772	25.9772	95	84.3333	95	84.3333	25.9772	#NAME?	Infinity	3	1
13	PRE_ARS	30.6876	0	30.6876	30.6876	30.6876	83.3333	79	83.3333	79	30.6876	Infinity	NaN	4	1
14	PRE_ALS	30.5125	0	30.5125	30.5125	30.5125	98.1667	78.8333	98.1667	78.8333	30.5125	Infinity	NaN	4	1
15	PRE_ARI	31.7076	0	31.7076	31.7076	31.7076	83.8333	94.6667	83.8333	94.6667	31.7076	#NAME?	NaN	4	1
16	PRE_ALI	29.5233	0	29.5233	29.5233	29.5233	97	95	97	95	29.5233	NaN	NaN	4	1
17	PRE_FRE	29.3884	0	29.3884	29.3884	29.3884	65.5	62.8333	65.5	62.8333	29.3884	NaN	NaN	5	1
18	PRE_FRI	31.319	0	31.319	31.319	31.319	70	61.3333	70	61.3333	31.319	Infinity	NaN	5	1
19	PRE_FLI	29.9771	0	29.9771	29.9771	29.9771	84.6667	62.3333	84.6667	62.3333	29.9771	NaN	#NAME?	5	1
20	PRE_FLE	27.7483	0	27.7483	27.7483	27.7483	89.6667	64.5	89.6667	64.5	27.7483	#NAME?	Infinity	5	1
21	PRE_PLS	29.6916	0	29.6916	29.6916	29.6916	80.1667	86.1667	80.1667	86.1667	29.6916	NaN	NaN	6	1
22	PRE_PRS	29.3884	0	29.3884	29.3884	29.3884	95.8333	86	95.8333	86	29.3884	NaN	NaN	6	1
23	PRE_PLI	27.851	0	27.851	27.851	27.851	83.5	104.333	83.5	104.333	27.851	#NAME?	Infinity	6	1
24	PRE_PRI	28.0562	0	28.0562	28.0562	28.0562	94.5	104.667	94.5	104.667	28.0562	#NAME?	Infinity	6	1
	Label	Mean	StdDev	Mode	Min	Max	X	Y	XM	YM	Median	Skew	Kurt	Slice	Group
1	POST_ARS	31.9632	0	31.9632	31.9632	31.9632	82.8333	63.3333	82.8333	63.3333	31.9632	Infinity	NaN	1	2
2	POST_ALS	31.3604	0	31.3604	31.3604	31.3604	96.5	63.6667	96.5	63.6667	31.3604	NaN	NaN	1	2
3	POST_ARI	31.7324	0	31.7324	31.7324	31.7324	82.5	83.3333	82.5	83.3333	31.7324	#NAME?	NaN	1	2
4	POST_ALI	31.2278	0	31.2278	31.2278	31.2278	97	81.3333	97	81.3333	31.2278	NaN	NaN	1	2
5	POST_FRE	25.4705	0	25.4705	25.4705	25.4705	66.1667	93	66.1667	93	25.4705	Infinity	#NAME?	2	2
6	POST_FRI	27.3191	0	27.3191	27.3191	27.3191	72.5	90	72.5	90	27.3191	#NAME?	NaN	2	2
7	POST_FLI	27.8424	0	27.8424	27.8424	27.8424	101.833	91.1667	101.833	91.1667	27.8424	NaN	NaN	2	2
8	POST_FLE	25.4004	0	25.4004	25.4004	25.4004	109.167	94	109.167	94	25.4004	#NAME?	#NAME?	2	2
9	POST_PLS	30.7209	0	30.7209	30.7209	30.7209	88.6667	59.8333	88.6667	59.8333	30.7209	Infinity	NaN	3	2
10	POST_PRS	31.3769	0	31.3769	31.3769	31.3769	105.833	59.1667	105.833	59.1667	31.3769	#NAME?	NaN	3	2
11	POST_PLI	30.2535	0	30.2535	30.2535	30.2535	88.6667	75.1667	88.6667	75.1667	30.2535	Infinity	NaN	3	2
12	POST_PRI	30.7792	0	30.7792	30.7792	30.7792	106.167	74.6667	106.167	74.6667	30.7792	NaN	NaN	3	2
13	PRE_ARS	30.6126	0	30.6126	30.6126	30.6126	82	74.5	82	74.5	30.6126	NaN	Infinity	4	2
14	PRE_ALS	31.0951	0	31.0951	31.0951	31.0951	99.3333	73.8333	99.3333	73.8333	31.0951	Infinity	NaN	4	2
15	PRE_ARI	31.0453	0	31.0453	31.0453	31.0453	82.3333	90.6667	82.3333	90.6667	31.0453	NaN	NaN	4	2
16	PRE_ALI	31.0287	0	31.0287	31.0287	31.0287	100.833	89.8333	100.833	89.8333	31.0287	Infinity	NaN	4	2
17	PRE_FRE	29.8932	0	29.8932	29.8932	29.8932	59.8333	72.3333	59.8333	72.3333	29.8932	Infinity	#NAME?	5	2
18	PRE_FRI	32.8083	0	32.8083	32.8083	32.8083	67.3333	69.5	67.3333	69.5	32.8083	NaN	#NAME?	5	2
19	PRE_FLI	32.8737	0	32.8737	32.8737	32.8737	92	68.3333	92	68.3333	32.8737	NaN	#NAME?	5	2
20	PRE_FLE	28.5248	0	28.5248	28.5248	28.5248	99.5	72.8333	99.5	72.8333	28.5248	NaN	Infinity	5	2
21	PRE_PLS	32.1443	0	32.1443	32.1443	32.1443	84.6667	52.6667	84.6667	52.6667	32.1443	#NAME?	Infinity	6	2
22	PRE_PRS	32.6611	0	32.6611	32.6611	32.6611	98.8333	52	98.8333	52	32.6611	NaN	#NAME?	6	2
23	PRE_PLI	32.4645	0	32.4645	32.4645	32.4645	85.1667	76.5	85.1667	76.5	32.4645	#NAME?	Infinity	6	2
24	PRE_PRI	31.7984	0	31.7984	31.7984	31.7984	99	75.8333	99	75.8333	31.7984	#NAME?	NaN	6	2
	Label	Mean	StdDev	Mode	Min	Max	X	Y	XM	YM	Median	Skew	Kurt	Slice	Group
1	POST_ARS	30.019	0	30.019	30.019	30.019	84	76.6667	84	76.6667	30.019	Infinity	NaN	1	3
2	POST_ALS	29.4559	0	29.4559	29.4559	29.4559	102.833	75.5	102.833	75.5	29.4559	#NAME?	NaN	1	3
3	POST_ARI	29.1182	0	29.1182	29.1182	29.1182	85	91.5	85	91.5	29.1182	Infinity	NaN	1	3
4	POST_ALI	28.6353	0	28.6353	28.6353	28.6353	103.333	92.6667	103.333	92.6667	28.6353	#NAME?	NaN	1	3
5	POST_FRE	24.4492	0	24.4492	24.4492	24.4492	39.6667	65.3333	39.6667	65.3333	24.4492	Infinity	NaN	2	3
6	POST_FRI	26.2644	0	26.2644	26.2644	26.2644	47.6667	66	47.6667	66	26.2644	NaN	Infinity	2	3
7	POST_FLI	24.6878	0	24.6878	24.6878	24.6878	94.5	63.6667	94.5	63.6667	24.6878	#NAME?	NaN	2	3
8	POST_FLE	22.798	0	22.798	22.798	22.798	102.833	67.3333	102.833	67.3333	22.798	#NAME?	#NAME?	2	3
9	POST_PLS	30.4791	0	30.4791	30.4791	30.4791	80.5	75.6667	80.5	75.6667	30.4791	#NAME?	#NAME?	3	3
10	POST_PRS	31.3355	0	31.3355	31.3355	31.3355	94.8333	75.3333	94.8333	75.3333	31.3355	NaN	NaN	3	3
11	POST_PLI	28.0562	0	28.0562	28.0562	28.0562	80.5	98.3333	80.5	98.3333	28.0562	#NAME?	Infinity	3	3
12	POST_PRI	29.5738	0	29.5738	29.5738	29.5738	94	96.8333	94	96.8333	29.5738	NaN	Infinity	3	3
13	PRE_ARS	31.8066	0	31.8066	31.8066	31.8066	84.1667	61.8333	84.1667	61.8333	31.8066	#NAME?	Infinity	4	3
14	PRE_ALS	30.5542	0	30.5542	30.5542	30.5542	99.3333	61.1667	99.3333	61.1667	30.5542	#NAME?	Infinity	4	3
15	PRE_ARI	32.284	0	32.284	32.284	32.284	85	80.6667	85	80.6667	32.284	NaN	NaN	4	3
16	PRE_ALI	30.3455	0	30.3455	30.3455	30.3455	100.833	80.6667	100.833	80.6667	30.3455	#NAME?	NaN	4	3
17	PRE_FRE	24.3518	0	24.3518	24.3518	24.3518	39.8333	66.3333	39.8333	66.3333	24.3518	#NAME?	Infinity	5	3
18	PRE_FRI	26.2731	0	26.2731	26.2731	26.2731	48.6667	65.1667	48.6667	65.1667	26.2731	Infinity	NaN	5	3
19	PRE_FLI	24.8995	0	24.8995	24.8995	24.8995	94.3333	65.6667	94.3333	65.6667	24.8995	Infinity	NaN	5	3
20	PRE_FLE	22.7169	0	22.7169	22.7169	22.7169	103.5	69	103.5	69	22.7169	#NAME?	NaN	5	3
21	PRE_PLS	29.7504	0	29.7504	29.7504	29.7504	76.3333	49.3333	76.3333	49.3333	29.7504	NaN	Infinity	6	3
22	PRE_PRS	31.8231	0	31.8231	31.8231	31.8231	94	51	94	51	31.8231	#NAME?	#NAME?	6	3
23	PRE_PLI	29.3041	0	29.3041	29.3041	29.3041	75.1667	71.8333	75.1667	71.8333	29.3041	Infinity	NaN	6	3
24	PRE_PRI	32.21	0	32.21	32.21	32.21	93.8333	71.1667	93.8333	71.1667	32.21	#NAME?	Infinity	6	3
	Label	Mean	StdDev	Mode	Min	Max	X	Y	XM	YM	Median	Skew	Kurt	Slice	Group
1	POST_ARS	30.1949	0	30.1949	30.1949	30.1949	77.1667	52.5	77.1667	52.5	30.1949	NaN	NaN	1	4
2	POST_ALS	31.7654	0	31.7654	31.7654	31.7654	92.5	51.5	92.5	51.5	31.7654	NaN	NaN	1	4
3	POST_ARI	29.076	0	29.076	29.076	29.076	76.3333	71	76.3333	71	29.076	Infinity	#NAME?	1	4
4	POST_ALI	29.9435	0	29.9435	29.9435	29.9435	90	69.5	90	69.5	29.9435	NaN	NaN	1	4
5	POST_FRE	27.2331	0	27.2331	27.2331	27.2331	72.8333	64.3333	72.8333	64.3333	27.2331	NaN	#NAME?	2	4
6	POST_FRI	27.8339	0	27.8339	27.8339	27.8339	77.6667	59.6667	77.6667	59.6667	27.8339	NaN	NaN	2	4
7	POST_FLI	29.0929	0	29.0929	29.0929	29.0929	97.8333	59.6667	97.8333	59.6667	29.0929	#NAME?	Infinity	2	4
8	POST_FLE	26.6807	0	26.6807	26.6807	26.6807	105	65	105	65	26.6807	#NAME?	Infinity	2	4
9	POST_PLS	32.7511	0	32.7511	32.7511	32.7511	75	49.1667	75	49.1667	32.7511	#NAME?	Infinity	3	4
10	POST_PRS	31.0868	0	31.0868	31.0868	31.0868	87.8333	48.6667	87.8333	48.6667	31.0868	#NAME?	NaN	3	4
11	POST_PLI	30.0442	0	30.0442	30.0442	30.0442	77.3333	69.5	77.3333	69.5	30.0442	Infinity	NaN	3	4
12	POST_PRI	29.0337	0	29.0337	29.0337	29.0337	87.5	67.8333	87.5	67.8333	29.0337	NaN	NaN	3	4
13	PRE_ARS	30.4791	0	30.4791	30.4791	30.4791	76.3333	49.5	76.3333	49.5	30.4791	#NAME?	#NAME?	4	4
14	PRE_ALS	31.8973	0	31.8973	31.8973	31.8973	91.3333	50.1667	91.3333	50.1667	31.8973	Infinity	NaN	4	4
15	PRE_ARI	29.7168	0	29.7168	29.7168	29.7168	76.6667	69.1667	76.6667	69.1667	29.7168	NaN	NaN	4	4
16	PRE_ALI	30.6459	0	30.6459	30.6459	30.6459	89.6667	68.1667	89.6667	68.1667	30.6459	#NAME?	Infinity	4	4
17	PRE_FRE	26.9831	0	26.9831	26.9831	26.9831	65.1667	60.5	65.1667	60.5	26.9831	NaN	NaN	5	4
18	PRE_FRI	29.7672	0	29.7672	29.7672	29.7672	70.5	58.5	70.5	58.5	29.7672	NaN	NaN	5	4
19	PRE_FLI	30.7875	0	30.7875	30.7875	30.7875	99.3333	58.1667	99.3333	58.1667	30.7875	#NAME?	NaN	5	4
20	PRE_FLE	28.1415	0	28.1415	28.1415	28.1415	105.667	60.3333	105.667	60.3333	28.1415	NaN	#NAME?	5	4
21	PRE_PLS	32.2511	0	32.2511	32.2511	32.2511	74.1667	49.6667	74.1667	49.6667	32.2511	NaN	NaN	6	4
22	PRE_PRS	30.7626	0	30.7626	30.7626	30.7626	90.8333	49	90.8333	49	30.7626	#NAME?	NaN	6	4
23	PRE_PLI	30.8042	0	30.8042	30.8042	30.8042	76.3333	67.6667	76.3333	67.6667	30.8042	Infinity	NaN	6	4
24	PRE_PRI	29.2365	0	29.2365	29.2365	29.2365	91.5	67.1667	91.5	67.1667	29.2365	Infinity	NaN	6	4
	Label	Mean	StdDev	Mode	Min	Max	X	Y	XM	YM	Median	Skew	Kurt	Slice	Group
1	POST_ARS	31.1698	0	31.1698	31.1698	31.1698	73.3333	53	73.3333	53	31.1698	Infinity	NaN	1	5
2	POST_ALS	31.037	0	31.037	31.037	31.037	88.1667	53	88.1667	53	31.037	NaN	Infinity	1	5
3	POST_ARI	29.9855	0	29.9855	29.9855	29.9855	74.1667	72	74.1667	72	29.9855	NaN	NaN	1	5
4	POST_ALI	30.5709	0	30.5709	30.5709	30.5709	88.3333	72.5	88.3333	72.5	30.5709	NaN	NaN	1	5
5	POST_FRE	28.6947	0	28.6947	28.6947	28.6947	70	46.5	70	46.5	28.6947	Infinity	NaN	2	5
6	POST_FRI	29.6243	0	29.6243	29.6243	29.6243	75.8333	43.6667	75.8333	43.6667	29.6243	Infinity	NaN	2	5
7	POST_FLI	29.6075	0	29.6075	29.6075	29.6075	103.167	43.8333	103.167	43.8333	29.6075	NaN	NaN	2	5
8	POST_FLE	28.3291	0	28.3291	28.3291	28.3291	108.667	47	108.667	47	28.3291	Infinity	#NAME?	2	5
9	POST_PLS	29.742	0	29.742	29.742	29.742	66.5	57	66.5	57	29.742	NaN	#NAME?	3	5
10	POST_PRS	30.0442	0	30.0442	30.0442	30.0442	82.1667	56.5	82.1667	56.5	30.0442	Infinity	NaN	3	5
11	POST_PLI	28.2865	0	28.2865	28.2865	28.2865	67.6667	76.1667	67.6667	76.1667	28.2865	Infinity	NaN	3	5
12	POST_PRI	29.1098	0	29.1098	29.1098	29.1098	82.1667	76.3333	82.1667	76.3333	29.1098	Infinity	#NAME?	3	5
13	PRE_ARS	29.3041	0	29.3041	29.3041	29.3041	81.8333	59.5	81.8333	59.5	29.3041	Infinity	NaN	4	5
14	PRE_ALS	30.2284	0	30.2284	30.2284	30.2284	95.6667	59.3333	95.6667	59.3333	30.2284	Infinity	#NAME?	4	5
15	PRE_ARI	27.9536	0	27.9536	27.9536	27.9536	83	81.5	83	81.5	27.9536	#NAME?	NaN	4	5
16	PRE_ALI	29.3884	0	29.3884	29.3884	29.3884	96.6667	80.5	96.6667	80.5	29.3884	NaN	NaN	4	5
17	PRE_FRE	26.6201	0	26.6201	26.6201	26.6201	53.8333	68.3333	53.8333	68.3333	26.6201	NaN	NaN	5	5
18	PRE_FRI	28.9152	0	28.9152	28.9152	28.9152	61.8333	64.8333	61.8333	64.8333	28.9152	#NAME?	NaN	5	5
19	PRE_FLI	29.7336	0	29.7336	29.7336	29.7336	86.1667	64.5	86.1667	64.5	29.7336	#NAME?	#NAME?	5	5
20	PRE_FLE	26.0992	0	26.0992	26.0992	26.0992	95.5	68.3333	95.5	68.3333	26.0992	#NAME?	Infinity	5	5
21	PRE_PLS	29.8092	0	29.8092	29.8092	29.8092	80.3333	75	80.3333	75	29.8092	Infinity	#NAME?	6	5
22	PRE_PRS	29.3463	0	29.3463	29.3463	29.3463	96.6667	74.3333	96.6667	74.3333	29.3463	NaN	NaN	6	5
23	PRE_PLI	28.295	0	28.295	28.295	28.295	81.1667	95.8333	81.1667	95.8333	28.295	#NAME?	NaN	6	5
24	PRE_PRI	27.9707	0	27.9707	27.9707	27.9707	96.5	94.8333	96.5	94.8333	27.9707	Infinity	NaN	6	5
	Label	Mean	StdDev	Mode	Min	Max	X	Y	XM	YM	Median	Skew	Kurt	Slice	Group
1	POST_ARS	31.1366	0	31.1366	31.1366	31.1366	79.1667	55	79.1667	55	31.1366	Infinity	NaN	1	6
2	POST_ALS	29.9519	0	29.9519	29.9519	29.9519	92.6667	55.1667	92.6667	55.1667	29.9519	NaN	Infinity	1	6
3	POST_ARI	31.3107	0	31.3107	31.3107	31.3107	81.5	78.5	81.5	78.5	31.3107	Infinity	#NAME?	1	6
4	POST_ALI	29.3884	0	29.3884	29.3884	29.3884	92	78.5	92	78.5	29.3884	NaN	NaN	1	6
5	POST_FRE	30.5626	0	30.5626	30.5626	30.5626	37	69.6667	37	69.6667	30.5626	NaN	Infinity	2	6
6	POST_FRI	31.2029	0	31.2029	31.2029	31.2029	43.5	66	43.5	66	31.2029	#NAME?	Infinity	2	6
7	POST_FLI	29.6327	0	29.6327	29.6327	29.6327	79.5	68.3333	79.5	68.3333	29.6327	Infinity	NaN	2	6
8	POST_FLE	30.1698	0	30.1698	30.1698	30.1698	82.8333	72.8333	82.8333	72.8333	30.1698	NaN	NaN	2	6
9	POST_PLS	31.1034	0	31.1034	31.1034	31.1034	85.5	58	85.5	58	31.1034	#NAME?	NaN	3	6
10	POST_PRS	32.0126	0	32.0126	32.0126	32.0126	101.667	58.1667	101.667	58.1667	32.0126	Infinity	NaN	3	6
11	POST_PLI	29.6411	0	29.6411	29.6411	29.6411	85.5	80.6667	85.5	80.6667	29.6411	Infinity	NaN	3	6
12	POST_PRI	29.9184	0	29.9184	29.9184	29.9184	99.6667	81.8333	99.6667	81.8333	29.9184	#NAME?	NaN	3	6
13	PRE_ARS	30.6459	0	30.6459	30.6459	30.6459	72.8333	50.6667	72.8333	50.6667	30.6459	#NAME?	Infinity	4	6
14	PRE_ALS	30.1363	0	30.1363	30.1363	30.1363	86.8333	50.8333	86.8333	50.8333	30.1363	NaN	NaN	4	6
15	PRE_ARI	30.9788	0	30.9788	30.9788	30.9788	76.5	72.5	76.5	72.5	30.9788	Infinity	#NAME?	4	6
16	PRE_ALI	29.9352	0	29.9352	29.9352	29.9352	88.8333	71.8333	88.8333	71.8333	29.9352	#NAME?	NaN	4	6
17	PRE_FRE	27.6712	0	27.6712	27.6712	27.6712	79.6667	56.8333	79.6667	56.8333	27.6712	NaN	#NAME?	5	6
18	PRE_FRI	31.6168	0	31.6168	31.6168	31.6168	84.8333	53.8333	84.8333	53.8333	31.6168	#NAME?	NaN	5	6
19	PRE_FLI	30.3789	0	30.3789	30.3789	30.3789	106.833	57	106.833	57	30.3789	#NAME?	NaN	5	6
20	PRE_FLE	27.0694	0	27.0694	27.0694	27.0694	112	62.3333	112	62.3333	27.0694	Infinity	#NAME?	5	6
21	PRE_PLS	31.5093	0	31.5093	31.5093	31.5093	77	59	77	59	31.5093	Infinity	NaN	6	6
22	PRE_PRS	32.0456	0	32.0456	32.0456	32.0456	90.6667	58.6667	90.6667	58.6667	32.0456	#NAME?	NaN	6	6
23	PRE_PLI	29.0083	0	29.0083	29.0083	29.0083	77.3333	82.8333	77.3333	82.8333	29.0083	Infinity	NaN	6	6
24	PRE_PRI	29.0929	0	29.0929	29.0929	29.0929	87.3333	83.3333	87.3333	83.3333	29.0929	#NAME?	Infinity	6	6
	Label	Mean	StdDev	Mode	Min	Max	X	Y	XM	YM	Median	Skew	Kurt	Slice	Group
1	POST_ARS	30.9705	0	30.9705	30.9705	30.9705	77.5	43.3333	77.5	43.3333	30.9705	Infinity	NaN	1	7
2	POST_ALS	32.325	0	32.325	32.325	32.325	92.6667	44	92.6667	44	32.325	Infinity	NaN	1	7
3	POST_ARI	29.3547	0	29.3547	29.3547	29.3547	78.1667	62.8333	78.1667	62.8333	29.3547	Infinity	NaN	1	7
4	POST_ALI	31.8891	0	31.8891	31.8891	31.8891	91.5	62	91.5	62	31.8891	#NAME?	Infinity	1	7
5	POST_FRE	26.1862	0	26.1862	26.1862	26.1862	87.8333	37	87.8333	37	26.1862	Infinity	#NAME?	2	7
6	POST_FRI	25.3741	0	25.3741	25.3741	25.3741	94.3333	33.3333	94.3333	33.3333	25.3741	NaN	Infinity	2	7
7	POST_FLI	31.8644	0	31.8644	31.8644	31.8644	115	33.6667	115	33.6667	31.8644	NaN	NaN	2	7
8	POST_FLE	26.8018	0	26.8018	26.8018	26.8018	120.333	37.6667	120.333	37.6667	26.8018	Infinity	#NAME?	2	7
9	POST_PLS	32.5874	0	32.5874	32.5874	32.5874	82	56.6667	82	56.6667	32.5874	Infinity	#NAME?	3	7
10	POST_PRS	31.2941	0	31.2941	31.2941	31.2941	99.3333	56.5	99.3333	56.5	31.2941	#NAME?	NaN	3	7
11	POST_PLI	30.4708	0	30.4708	30.4708	30.4708	83.1667	81.8333	83.1667	81.8333	30.4708	NaN	NaN	3	7
12	POST_PRI	28.5418	0	28.5418	28.5418	28.5418	100.333	80.6667	100.333	80.6667	28.5418	Infinity	Infinity	3	7
13	PRE_ARS	27.7311	0	27.7311	27.7311	27.7311	71.5	52	71.5	52	27.7311	NaN	#NAME?	4	7
14	PRE_ALS	26.3426	0	26.3426	26.3426	26.3426	89.3333	51.3333	89.3333	51.3333	26.3426	#NAME?	NaN	4	7
15	PRE_ARI	26.073	0	26.073	26.073	26.073	70	75.6667	70	75.6667	26.073	#NAME?	Infinity	4	7
16	PRE_ALI	28.8813	0	28.8813	28.8813	28.8813	85	75.6667	85	75.6667	28.8813	#NAME?	NaN	4	7
17	PRE_FRE	26.5768	0	26.5768	26.5768	26.5768	80.5	44.6667	80.5	44.6667	26.5768	Infinity	NaN	5	7
18	PRE_FRI	27.2073	0	27.2073	27.2073	27.2073	85.5	41	85.5	41	27.2073	#NAME?	Infinity	5	7
19	PRE_FLI	30.9123	0	30.9123	30.9123	30.9123	103.5	41.8333	103.5	41.8333	30.9123	NaN	NaN	5	7
20	PRE_FLE	28.2353	0	28.2353	28.2353	28.2353	108.333	44.1667	108.333	44.1667	28.2353	Infinity	NaN	5	7
21	PRE_PLS	30.6876	0	30.6876	30.6876	30.6876	84.1667	60	84.1667	60	30.6876	Infinity	NaN	6	7
22	PRE_PRS	29.2028	0	29.2028	29.2028	29.2028	102.167	59.1667	102.167	59.1667	29.2028	NaN	Infinity	6	7
23	PRE_PLI	28.4993	0	28.4993	28.4993	28.4993	85.6667	85.1667	85.6667	85.1667	28.4993	#NAME?	NaN	6	7
24	PRE_PRI	26.4901	0	26.4901	26.4901	26.4901	102.667	82.8333	102.667	82.8333	26.4901	#NAME?	Infinity	6	7
	Label	Mean	StdDev	Mode	Min	Max	X	Y	XM	YM	Median	Skew	Kurt	Slice	Group
1	POST_ARS	30.7043	0	30.7043	30.7043	30.7043	72.6667	58	72.6667	58	30.7043	Infinity	Infinity	1	8
2	POST_ALS	32.0126	0	32.0126	32.0126	32.0126	89.5	58.1667	89.5	58.1667	32.0126	Infinity	NaN	1	8
3	POST_ARI	28.805	0	28.805	28.805	28.805	71.3333	74.1667	71.3333	74.1667	28.805	#NAME?	Infinity	1	8
4	POST_ALI	30.1112	0	30.1112	30.1112	30.1112	90.6667	72.6667	90.6667	72.6667	30.1112	Infinity	NaN	1	8
5	POST_FRE	28.0732	0	28.0732	28.0732	28.0732	84.5	52.1667	84.5	52.1667	28.0732	NaN	Infinity	2	8
6	POST_FRI	27.9878	0	27.9878	27.9878	27.9878	88	51.1667	88	51.1667	27.9878	Infinity	NaN	2	8
7	POST_FLI	29.4727	0	29.4727	29.4727	29.4727	99.6667	50.5	99.6667	50.5	29.4727	NaN	NaN	2	8
8	POST_FLE	28.2609	0	28.2609	28.2609	28.2609	103.5	50.8333	103.5	50.8333	28.2609	NaN	Infinity	2	8
9	POST_PLS	29.5485	0	29.5485	29.5485	29.5485	75.1667	61	75.1667	61	29.5485	Infinity	NaN	3	8
10	POST_PRS	28.8897	0	28.8897	28.8897	28.8897	93.1667	61	93.1667	61	28.8897	#NAME?	NaN	3	8
11	POST_PLI	29.2112	0	29.2112	29.2112	29.2112	73.6667	79	73.6667	79	29.2112	#NAME?	NaN	3	8
12	POST_PRI	28.6353	0	28.6353	28.6353	28.6353	94	77.3333	94	77.3333	28.6353	#NAME?	NaN	3	8
13	PRE_ARS	33.7526	0	33.7526	33.7526	33.7526	74.1667	43.1667	74.1667	43.1667	33.7526	NaN	NaN	4	8
14	PRE_ALS	34.4154	0	34.4154	34.4154	34.4154	90.5	42.6667	90.5	42.6667	34.4154	#NAME?	NaN	4	8
15	PRE_ARI	32.1525	0	32.1525	32.1525	32.1525	73.6667	61.1667	73.6667	61.1667	32.1525	Infinity	Infinity	4	8
16	PRE_ALI	33.6066	0	33.6066	33.6066	33.6066	92.1667	59.6667	92.1667	59.6667	33.6066	#NAME?	Infinity	4	8
17	PRE_FRE	29.1352	0	29.1352	29.1352	29.1352	74	62	74	62	29.1352	Infinity	NaN	5	8
18	PRE_FRI	30.8791	0	30.8791	30.8791	30.8791	77.5	58.6667	77.5	58.6667	30.8791	Infinity	NaN	5	8
19	PRE_FLI	32.325	0	32.325	32.325	32.325	95	59	95	59	32.325	Infinity	NaN	5	8
20	PRE_FLE	30.0525	0	30.0525	30.0525	30.0525	100.167	59.3333	100.167	59.3333	30.0525	NaN	NaN	5	8
21	PRE_PLS	32.9145	0	32.9145	32.9145	32.9145	74.8333	52.1667	74.8333	52.1667	32.9145	NaN	Infinity	6	8
22	PRE_PRS	31.4928	0	31.4928	31.4928	31.4928	91.8333	52.8333	91.8333	52.8333	31.4928	#NAME?	NaN	6	8
23	PRE_PLI	32.571	0	32.571	32.571	32.571	75	68.5	75	68.5	32.571	#NAME?	Infinity	6	8
24	PRE_PRI	32.062	0	32.062	32.062	32.062	93	66.8333	93	66.8333	32.062	NaN	NaN	6	8
	Label	Mean	StdDev	Mode	Min	Max	X	Y	XM	YM	Median	Skew	Kurt	Slice	Group
1	POST_ARS	31.468	0	31.468	31.468	31.468	67.6667	62	67.6667	62	31.468	NaN	NaN	1	9
2	POST_ALS	32.3907	0	32.3907	32.3907	32.3907	81.3333	62.5	81.3333	62.5	32.3907	NaN	Infinity	1	9
3	POST_ARI	29.2028	0	29.2028	29.2028	29.2028	69	80.5	69	80.5	29.2028	NaN	Infinity	1	9
4	POST_ALI	30.1447	0	30.1447	30.1447	30.1447	80.1667	80.5	80.1667	80.5	30.1447	Infinity	#NAME?	1	9
5	POST_FRE	25.4267	0	25.4267	25.4267	25.4267	57	75	57	75	25.4267	NaN	#NAME?	2	9
6	POST_FRI	27.9707	0	27.9707	27.9707	27.9707	64	71.8333	64	71.8333	27.9707	Infinity	NaN	2	9
7	POST_FLI	27.9194	0	27.9194	27.9194	27.9194	92.1667	72	92.1667	72	27.9194	NaN	NaN	2	9
8	POST_FLE	25.5405	0	25.5405	25.5405	25.5405	98.1667	72.8333	98.1667	72.8333	25.5405	#NAME?	NaN	2	9
9	POST_PLS	29.9603	0	29.9603	29.9603	29.9603	74.6667	62.8333	74.6667	62.8333	29.9603	NaN	NaN	3	9
10	POST_PRS	29.742	0	29.742	29.742	29.742	91.5	63	91.5	63	29.742	NaN	#NAME?	3	9
11	POST_PLI	27.7825	0	27.7825	27.7825	27.7825	75.3333	84	75.3333	84	27.7825	Infinity	#NAME?	3	9
12	POST_PRI	28.278	0	28.278	28.278	28.278	91.6667	83.5	91.6667	83.5	28.278	#NAME?	NaN	3	9
13	PRE_ARS	29.1521	0	29.1521	29.1521	29.1521	74.1667	61.3333	74.1667	61.3333	29.1521	#NAME?	NaN	4	9
14	PRE_ALS	29.8008	0	29.8008	29.8008	29.8008	88.5	61.1667	88.5	61.1667	29.8008	NaN	NaN	4	9
15	PRE_ARI	26.0121	0	26.0121	26.0121	26.0121	74.8333	79.5	74.8333	79.5	26.0121	#NAME?	NaN	4	9
16	PRE_ALI	27.8168	0	27.8168	27.8168	27.8168	87.6667	79.3333	87.6667	79.3333	27.8168	Infinity	NaN	4	9
17	PRE_FRE	27.8253	0	27.8253	27.8253	27.8253	52.8333	68.1667	52.8333	68.1667	27.8253	NaN	NaN	5	9
18	PRE_FRI	32.2922	0	32.2922	32.2922	32.2922	58.6667	63.3333	58.6667	63.3333	32.2922	Infinity	#NAME?	5	9
19	PRE_FLI	32.1607	0	32.1607	32.1607	32.1607	90.1667	61.6667	90.1667	61.6667	32.1607	#NAME?	Infinity	5	9
20	PRE_FLE	29.5317	0	29.5317	29.5317	29.5317	95.8333	62	95.8333	62	29.5317	Infinity	#NAME?	5	9
21	PRE_PLS	32.1772	0	32.1772	32.1772	32.1772	75.5	58.5	75.5	58.5	32.1772	Infinity	NaN	6	9
22	PRE_PRS	31.3024	0	31.3024	31.3024	31.3024	91.1667	58.3333	91.1667	58.3333	31.3024	#NAME?	Infinity	6	9
23	PRE_PLI	29.9184	0	29.9184	29.9184	29.9184	77.5	76.6667	77.5	76.6667	29.9184	#NAME?	NaN	6	9
24	PRE_PRI	29.6579	0	29.6579	29.6579	29.6579	91	75.5	91	75.5	29.6579	#NAME?	NaN	6	9
	Label	Mean	StdDev	Mode	Min	Max	X	Y	XM	YM	Median	Skew	Kurt	Slice	Group
1	POST_ARS	29.5401	0	29.5401	29.5401	29.5401	75	73.5	75	73.5	29.5401	Infinity	#NAME?	1	10
2	POST_ALS	30.9954	0	30.9954	30.9954	30.9954	91.1667	73.5	91.1667	73.5	30.9954	#NAME?	NaN	1	10
3	POST_ARI	28.7371	0	28.7371	28.7371	28.7371	76	91.6667	76	91.6667	28.7371	#NAME?	NaN	1	10
4	POST_ALI	29.1943	0	29.1943	29.1943	29.1943	90	91.1667	90	91.1667	29.1943	#NAME?	Infinity	1	10
5	POST_FRE	24.2543	0	24.2543	24.2543	24.2543	59.1667	66.3333	59.1667	66.3333	24.2543	#NAME?	Infinity	2	10
6	POST_FRI	26.0382	0	26.0382	26.0382	26.0382	64.5	63.3333	64.5	63.3333	26.0382	Infinity	NaN	2	10
7	POST_FLI	27.4824	0	27.4824	27.4824	27.4824	92.8333	63.3333	92.8333	63.3333	27.4824	#NAME?	#NAME?	2	10
8	POST_FLE	25.8988	0	25.8988	25.8988	25.8988	99.3333	66	99.3333	66	25.8988	Infinity	NaN	2	10
9	POST_PLS	32.1689	0	32.1689	32.1689	32.1689	77.5	83.1667	77.5	83.1667	32.1689	#NAME?	NaN	3	10
10	POST_PRS	30.7959	0	30.7959	30.7959	30.7959	94.3333	82	94.3333	82	30.7959	Infinity	NaN	3	10
11	POST_PLI	28.9067	0	28.9067	28.9067	28.9067	78.6667	104	78.6667	104	28.9067	#NAME?	Infinity	3	10
12	POST_PRI	27.9023	0	27.9023	27.9023	27.9023	97.8333	103.167	97.8333	103.167	27.9023	#NAME?	Infinity	3	10
13	PRE_ARS	30.0693	0	30.0693	30.0693	30.0693	80	76.5	80	76.5	30.0693	NaN	Infinity	4	10
14	PRE_ALS	31.3273	0	31.3273	31.3273	31.3273	93.5	76.1667	93.5	76.1667	31.3273	#NAME?	NaN	4	10
15	PRE_ARI	28.8135	0	28.8135	28.8135	28.8135	79.6667	92.1667	79.6667	92.1667	28.8135	#NAME?	Infinity	4	10
16	PRE_ALI	30.0274	0	30.0274	30.0274	30.0274	94	92.5	94	92.5	30.0274	NaN	NaN	4	10
17	PRE_FRE	26.5681	0	26.5681	26.5681	26.5681	58	89.6667	58	89.6667	26.5681	Infinity	NaN	5	10
18	PRE_FRI	28.7117	0	28.7117	28.7117	28.7117	62.3333	85.1667	62.3333	85.1667	28.7117	#NAME?	NaN	5	10
19	PRE_FLI	31.1781	0	31.1781	31.1781	31.1781	88.3333	83	88.3333	83	31.1781	NaN	NaN	5	10
20	PRE_FLE	27.6454	0	27.6454	27.6454	27.6454	95.3333	86.1667	95.3333	86.1667	27.6454	Infinity	NaN	5	10
21	PRE_PLS	30.5375	0	30.5375	30.5375	30.5375	74.1667	76.5	74.1667	76.5	30.5375	Infinity	NaN	6	10
22	PRE_PRS	29.7168	0	29.7168	29.7168	29.7168	89.8333	76.1667	89.8333	76.1667	29.7168	NaN	NaN	6	10
23	PRE_PLI	28.6268	0	28.6268	28.6268	28.6268	75.5	96.1667	75.5	96.1667	28.6268	Infinity	Infinity	6	10
24	PRE_PRI	27.3879	0	27.3879	27.3879	27.3879	91.6667	95.5	91.6667	95.5	27.3879	Infinity	NaN	6	10
